# Supplementary material for: Endophytic Trichoderma spp. can protect strawberry and privet plants from infection by the fungus Armillaria mellea
Source: PLOS journal article supplement (doi:10.1371/journal.pone.0271622), 2022-08-01
Supplement: S3 (10.1371/journal.pone.0271622.s003) [file journal.pone.0271622.s003]

**S2 Table. Disease Severity Index (0 – 6 pt. scale) descriptions for *Armillaria mellea* infection of strawberry after three months.**

| <b>DSI</b> | <b>Above-ground Symptoms</b> | <b>Below-ground Symptoms</b>                          | <b>Re-isolation</b>                                  |
|------------|------------------------------|-------------------------------------------------------|------------------------------------------------------|
| 0          | No aerial symptoms           | No visible <i>Armillaria</i> mycelium                 | Unsuccessful re-isolation of <i>Armillaria</i>       |
| 1          | Aerial symptoms present      | No visible <i>Armillaria</i> mycelium                 | Unsuccessful re-isolation of <i>Armillaria</i>       |
| 2          | Aerial symptoms present      | No visible <i>Armillaria</i> mycelium                 | Presence of <i>Armillaria</i> confirmed by isolation |
| 3          | No aerial symptoms           | Visible <i>Armillaria</i> mycelium colonization       | Presence of <i>Armillaria</i> confirmed by isolation |
| 4          | Aerial symptoms present      | Visible <i>Armillaria</i> mycelium colonization       | Presence of <i>Armillaria</i> confirmed by isolation |
| 5          | Progressed aerial symptoms   | Visible/heavy <i>Armillaria</i> mycelium colonization | Presence of <i>Armillaria</i> confirmed by isolation |
| 6          | Dead plant                   | Visible/heavy <i>Armillaria</i> mycelium colonization | Presence of <i>Armillaria</i> confirmed by isolation |
